# Supplementary material
Source: PubMed Central journal article supplement (PMC3840473)
Supplement: Supp_Fig1.pdf [file Supp_Fig1.pdf]

## Supplementary Data

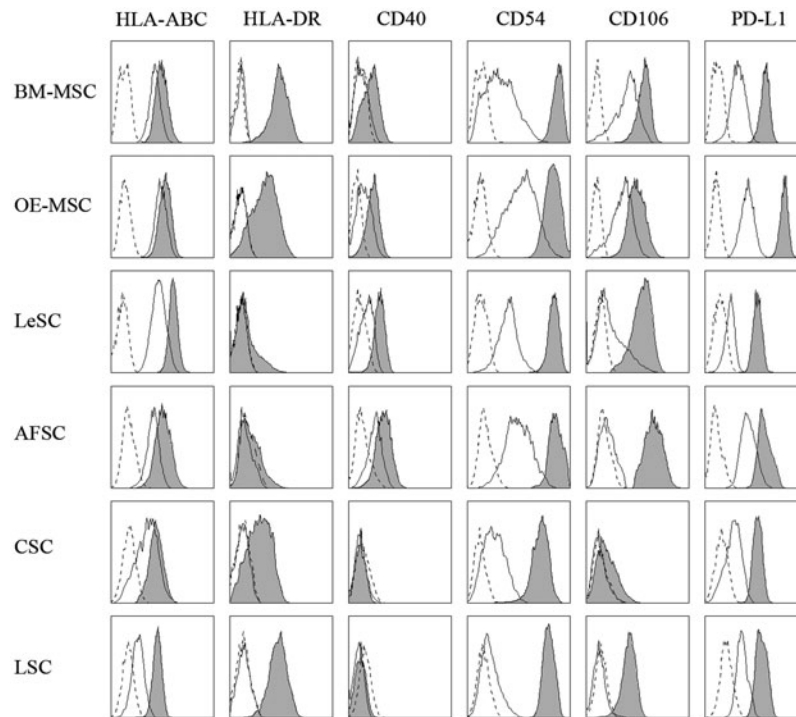

**SUPPLEMENTARY FIG. S1.** Expression of different markers on various human stem cells (SCs) in resting and primed conditions. Representative FACS analysis of different SC types showing the expression of HLA-ABC, HLA-DR, CD40, CD54 (ICAM-1), CD106 (VCAM-1), and CD274 (PD-L1) at resting and inflammatory conditions. *Dashed curve* indicates the isotype controls, while *open* and *filled curves* indicate resting and primed SCs, respectively.
